# Engineering stringent genetic biocontainment of yeast with a protein stability switch

Stefan A. Hoffmann, Yizhi Cai

Correspondence to: [yizhi.cai@manchester.ac.uk](mailto:yizhi.cai@manchester.ac.uk)

Manchester Institute of Biotechnology, University of Manchester, M1 7DN, UK

## Abstract

Synthetic biology holds immense promise to tackle key problems we are facing, for instance in resource use, environmental health, and human health care. However, comprehensive safety measures are needed to deploy genetically engineered microorganisms in open-environment applications. Here, we describe a genetic biocontainment system based on conditional stability of essential proteins. We used a yeast-adapted destabilizing domain decon, which can be stabilized by estradiol addition (ERdd). Leveraging the yeast GFP collection and lab automation platforms, we ERdd-tagged 775 essential genes and screened for strains with estradiol dependent growth. Three genes, *SPC110*, *DIS3* and *RRP46*, were found to be particularly suitable. Respective strains showed no growth defect in the presence of estradiol and strong growth inhibition in its absence. Of these, *SPC110-ERdd* offered the most stringent containment, with an escape frequency of  $7.0 \times 10^{-8}$ , and full growth restoration at 100 nM estradiol. By systematically analysing the containment escapees, we identified the non-essential C-terminal region of *SPC110* as target for escape mutations. Its removal decreased the escape frequency with a single ERdd tag further to  $4.3 \times 10^{-9}$ . Combining *SPC110-ERdd* with a second ERdd tag on either *DIS3* or *RRP46* resulted in escape frequencies below the detection limit of the used assay ( $< 2 \times 10^{-10}$ ). Being based on conditional protein stability, this approach is mechanistically orthogonal to previously reported intrinsic biocontainment systems. It thus can be readily combined with other systems, for instance ones based on transcriptional or translational control of essential gene expression, to achieve multiplexed, extremely stringent control over the survival of engineered organisms.

## Introduction

Fuelled by decreasing cost of DNA sequencing and synthesis, as well as an expanding toolkit for genetic manipulation of organisms from all kingdoms of life, synthetic biology is a rapidly advancing field. It holds promise to tackle key problems humanity is facing, *e.g.* by making agricultural and industrial production more efficient and sustainable, by providing bioremediation of environmental pollution or by offering novel solutions for previously intractable healthcare needs. Comprehensive safety engineering, a hallmark of every mature engineering technology, is required to safely deliver on this promise and pre-empt risks that could emanate from synthetic biology technologies and products.

One layer of biosafety engineering is the development and deployment of genetic biocontainment technologies. It is intended to curb an organism's ability to survive or transfer its genetic material outside of defined, permissive growth conditions. This intrinsic containment of genetically modified microorganisms is particularly attractive for large-scale or open-environment applications, or when working with pathogens. Historically, genetic biocontainment work has been largely focussed either on auxotrophies created by gene knockouts [1, 2], or on control using different 'suicide genes', effectors like toxins or Cas endonucleases, with varying degrees of regulatory complexity [3-10]. Auxotrophic

containment is generally genetically stable but has the caveat that the essential metabolite might be available in certain natural environments, *e.g.* by cross-feeding. In contrast, ‘suicide’ systems typically have a straightforward evolutionary trajectory for escape via the mutational inactivation of the effector gene. Due to these limitations of auxotrophic and suicide containment, control of essential genes for containment presents an attractive alternative approach. Dedicated containment systems targeting essential genes along the flow of genetic information, from genomic presence [11] to transcription [11-13] and translation [13], have previously been developed. Combining different orthogonal control measures allows creating extremely stringent containment [11, 13].

An approach so far not systematically explored for biocontainment is control over the *in vivo* half-life of essential proteins, adding post-translational control over essential genes. There are several switchable degron systems that allow targeted protein degradation in eukaryotes and have been used to link yeast cell viability to cues of light [14], temperature [15] or small molecules [16-18]. Control by small molecules absent in most natural environments seems to be particularly well-suited to be leveraged in a generalistic biocontainment system. The auxin inducible degron system [16, 17] and the SMASh tag [18] are small molecule-controlled switchable degrons that have been used in yeast on essential proteins, creating conditional cell fitness. Both are functional OFF switches, degrading the target protein in the presence of the molecule. However, this operation logic when applied to essential genes is not suitable for most biocontainment applications, in which proliferation in natural environments is to be prohibited.

Another class of switchable degrons functions as ON switch: the destabilizing domain (DD) degrons [19, 20]. Here, we describe the systematic development of a highly stringent containment system based on an estrogen receptor-derived DD degron optimised for yeast (ERdd) (Figure 1A). By screening more than 70% of *S. cerevisiae* essential genes, we have identified particularly suited targets for biocontainment with this approach. Systematic characterisation of containment escape modes allowed engineering an improved system. We further demonstrated the feasibility to multiplex these protein switches and have constructed safeguarded strains with escape frequencies of  $<2 \times 10^{-10}$  that maintain wild-type-like fitness.

## Results

### ERdd system in yeast

The behaviour of the yeast-adapted ERdd tag *in vivo* was tested by expressing a GFP-ERdd fusion protein from a centromeric vector over a range of estradiol concentrations and assessing GFP fluorescence (Figure 1B). In the absence of estradiol specific GFP fluorescence was reduced by 95% compared to the fluorescence with 10  $\mu$ M estradiol. At this highest tested estradiol concentration, specific GFP fluorescence of the GFP-ERdd samples reached 70% of that of GFP without ERdd tag. This indicated an exploitable dynamic window to leverage the ERdd tag to couple organism survival to estradiol supplementation by fusion to suitable essential proteins.

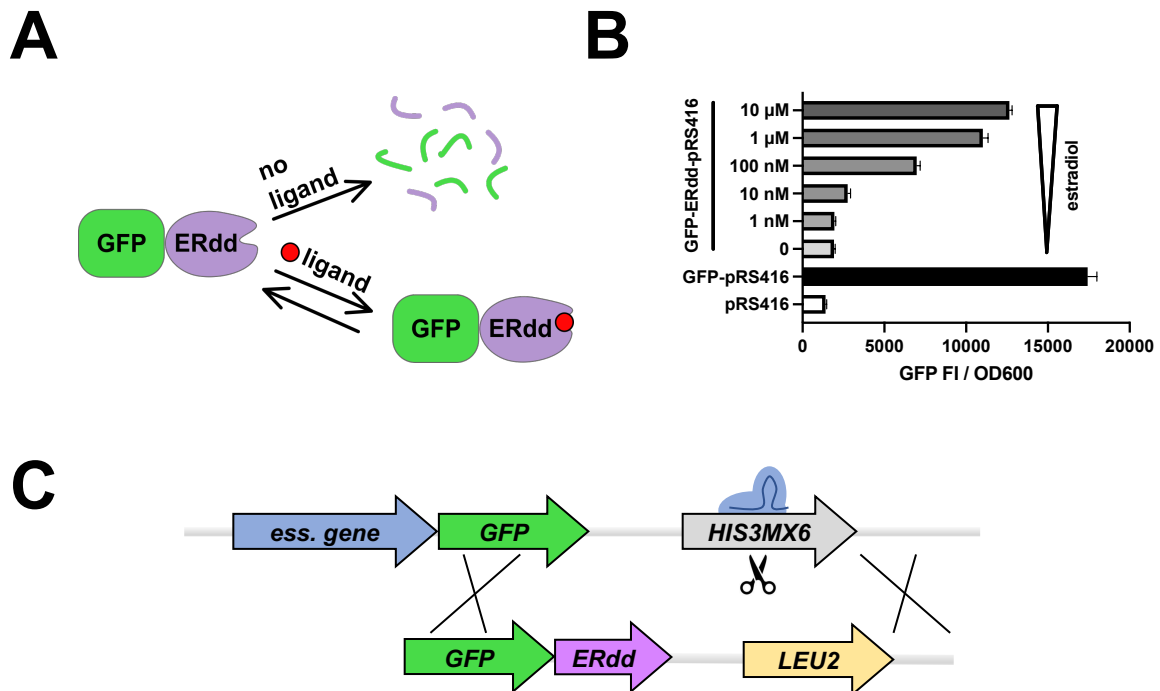

**Figure 1:** ERdd tag for targeted protein degradation control in yeast. **(A)** Concept of conditional protein degradation of protein of interest, here GFP, by fusion to ERdd. In the absence of its ligand, ERdd is in an unordered conformation, triggering its proteasomal degradation along with the protein it is fused to. Availability of the ligand stabilises ERdd and greatly increases protein half-life. **(B)** Estradiol dependence of fluorescence of GFP-ERdd fusion on centromeric plasmid in yeast. **(C)** Scheme of Cas9-assisted conversion of essential GFP library to essential GFP-ERdd library with switch of marker gene from *HIS3MX6* to *LEU2*.

## Essential GFP-ERdd library creation and high-throughput screening for estradiol response

We performed a large-scale screen of essential genes for the desired growth response when fused to the ERdd tag – uncompromised fitness in the presence of 1  $\mu$ M estradiol (permissive condition) and a severe fitness impediment in its absence (restrictive condition). To this end, the yeast GFP collection was leveraged to facilitate ERdd tag integration. The yeast GFP collection contains 4,159 strains, in which ORFs are individually tagged with a C-terminal GFP and a downstream *HIS3MX6* selectable marker gene. This constant region was used as a landing pad for C-terminal addition of the ERdd tag, allowing to use a single donor construct for editing of all strains of interest (Figure 1C). The edit was mediated by a CRISPR/Cas9 system with an integration cassette also swapping the *HIS3MX6* marker for a *LEU2* marker gene, facilitating efficient editing and selection of correct edits. Out of 1103 *S. cerevisiae* ORFs deemed essential<sup>1</sup>, 822 are physically represented as strains in the yeast GFP collection. Out of these, 775 strains (94%) were converted into GFP-ERdd fusion strains (Supplementary Data S1). The others were either missing (24) in the library distribution we had, did not grow (4), or no Leu<sup>+</sup>/His<sup>-</sup> colonies were obtained (19) from the transformation of the CRISPR/Cas components.

From the essential GFP-ERdd library, estradiol dependent strains were identified by a bipartite screening (Supplementary Data S2). The primary screening for estradiol response was performed by pinning the generated essential GFP-ERdd library on YPD without (restrictive) and with 1  $\mu$ M estradiol (permissive) and analysing the colony size ratios (Figure 2A). For most of the essential genes, ERdd-dependent degradation without estradiol appeared to be not

<sup>1</sup> <https://rdr.io/bioc/SLGI/man/essglist.html>

substantial enough to cause a phenotype, but about 5% of the screened strains showed a clear dependence on estradiol for proper growth (Figure 2B). The 46 strains with the highest ratio of colony size between permissive and restrictive conditions were chosen for a subsequent screening in liquid culture in plate reader assays. For almost all of these strains differential growth in response to estradiol was also observed in the liquid culture screening (Figure 2C,D), from which strains were ranked by the mean area under the curve of the difference of the growth curves under permissive and restrictive conditions.

Most of the screened essential gene-*GFP-ERdd* fusions did not show a clear estradiol-dependent phenotype. To investigate whether this was due to a lack of ERdd-mediated essential protein degradation, the GFP-ERdd strains of the highly expressed essential genes *PGK1*, *YEF3*, *TPI1* and *GPM1* were assayed for growth and GFP fluorescence when cultured with and without estradiol (Figure S1). Relative fluorescence intensities suggested that substantial proportions of the respective fusion proteins (47-82% at 24h) were being degraded upon estradiol withdrawal. However, the remaining essential protein amounts evidently were sufficient to support growth, as the strains showed either no or only minor growth inhibition in the absence of estradiol.

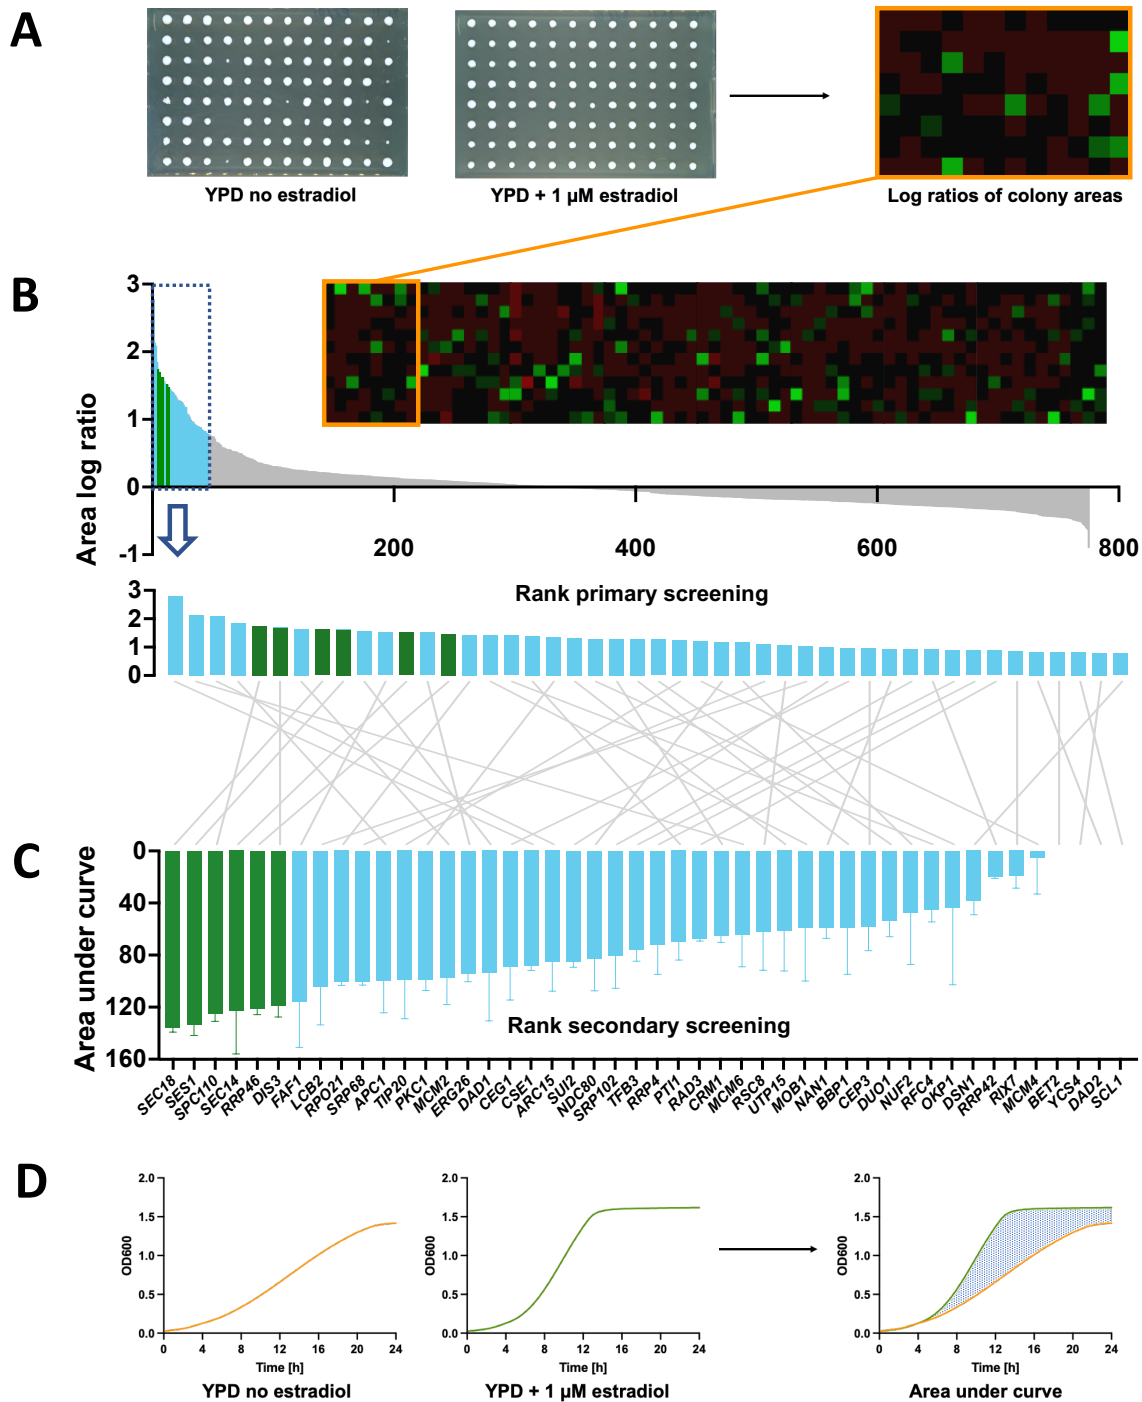

**Figure 2:** Bipartite screening for estradiol dependence of essential GFP-ERdd strains. **(A)** For the primary screening, essential GFP-ERdd strains were pinned on YPD agar without and with 1  $\mu$ M estradiol. The area log ratios between permissive and restrictive condition were determined and used as metric for ranking. In the heatmap bright green indicates a strongly positive log ratio, *i.e.* a larger colony area with estradiol than without. **(B)** Measured area log ratios for the 775 strains in the primary screening were ranked from largest to smallest and the 46 highest-scoring strains were subjected to **(C)** the secondary screening in liquid culture. The 6 highest-scoring strains in the secondary screening (marked in green) were created as direct fusions in a BY4742 background. **(D)** In the secondary screening, growth curves with and without estradiol were recorded for the 46 select strains, and the area of the difference curve was used as metric for ranking.

### Estradiol response of single and double ERdd tagged strains

The genes corresponding to the six highest ranked strains in the secondary screening, *SEC18*, *SES1*, *SPC110*, *SEC14*, *RRP46* and *DIS3*, were directly and without a marker fused to ERdd in a BY4742 background and assayed. The resulting six strains all showed a strong dependency on estradiol for growth (Figure 3A, Figure S1). A genetic safeguard should not lower fitness under permissive conditions, as to not create an evolutionary incentive to inactivate the safeguard. Three of the strains, *SPC110-ERdd*, *RRP46-ERdd* and *DIS3-ERdd*, exhibited a growth indistinguishable from the parental strain in permissive medium (YPD with 1  $\mu$ M estradiol) (Figure 3B) and were used for further work. Of these, *SPC110-ERdd* displayed particularly favourable behaviour, with a severe growth inhibition without estradiol and full restoration of growth already at 100 nM estradiol (Figure 5A). Fusion of ERdd to a truncated *SPC110*, removing its non-essential C-terminal region, resulted in a strain with similarly favourable estradiol dependence; growth of *SPC110 $\Delta$ 845-ERdd* likewise was fully restored at 100 nM estradiol (Figure 5C).

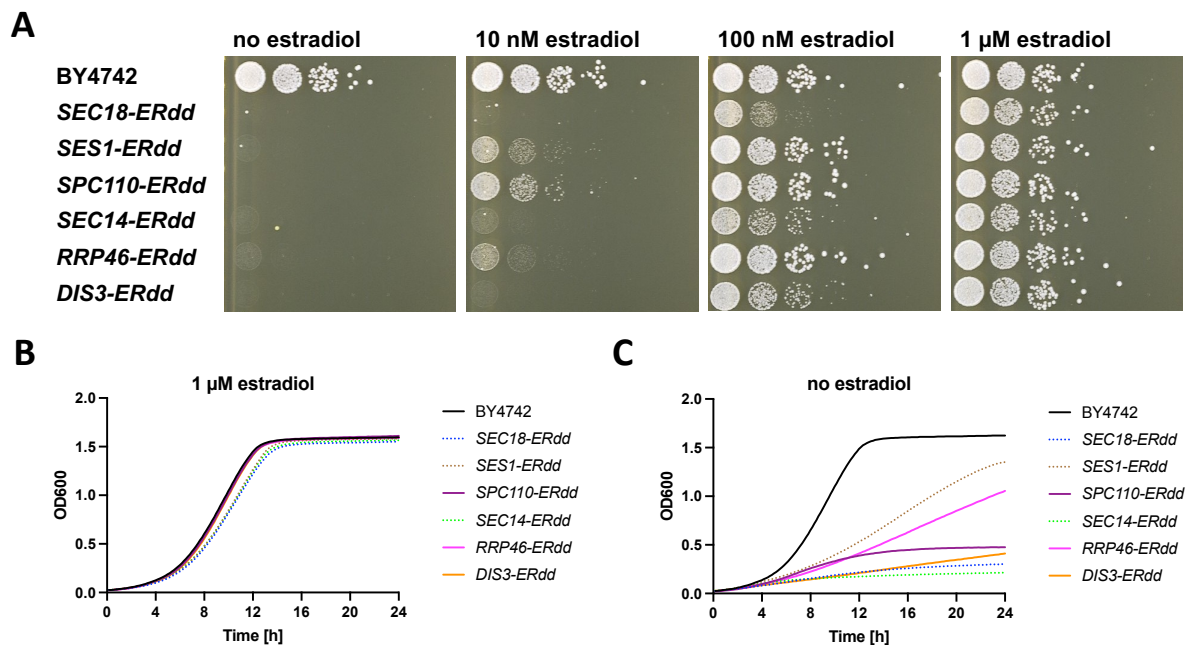

**Figure 3:** Assaying growth of ERdd fusion strains for estradiol dependence. (A) Spot assay of strains with direct ERdd fusion to a single essential gene at different estradiol concentrations on YPD agar, showing strong dependence on estradiol for all tested ERdd strains. (B) Growth assay in YPD with 1  $\mu$ M estradiol, showing strains with growth indistinguishable from that of the parental strain BY4742 in solid lines and ones with a slight apparent growth defect with dashed lines. (C) All tested ERdd strains show a substantial to very strong growth defect without estradiol.

Subsequently, strains with two ERdd-tagged genes were created for combinations of *SPC110*, *RRP46* and *DIS3*. All dual ERdd strains exhibit strict dependence on estradiol. Growth of *SPC110-ERdd/RRP46-ERdd* was fully restored with 100 nM estradiol, whereas the other two strains required a higher estradiol concentration, reaching wild-type-like growth at 1  $\mu$ M estradiol (Figure 4, Figure S2).

**A**

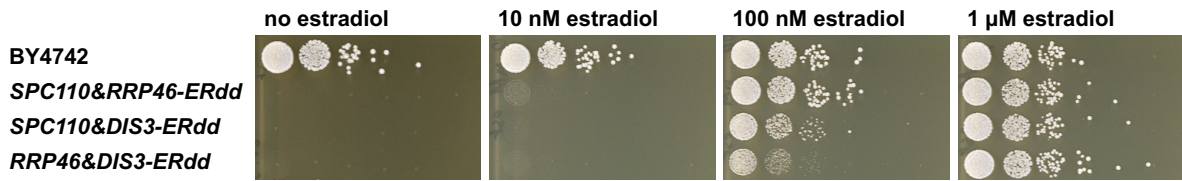

**B**

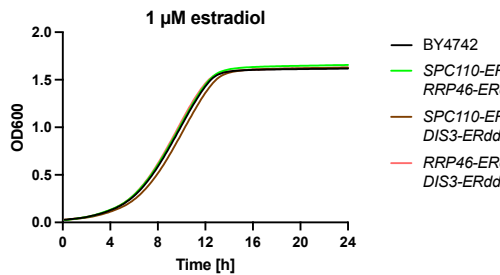

**C**

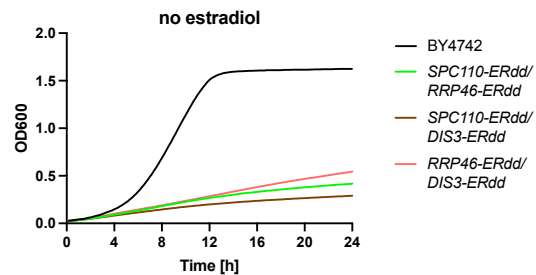

**Figure 4:** Assaying estradiol dependence of strains with two essential genes fused to ERdd. (A) Spot assay of strains at different estradiol concentrations on YPD agar, showing strict dependence on estradiol for all dual ERdd strains. Growth assay of dual ERdd strains in YPD (B) with 1  $\mu$ M estradiol and (C) no estradiol.

### Escape rates and analysis of escapees

The estradiol regulated strains not exhibiting any growth impairment under permissive conditions, *SPC110-ERdd*, *RRP46-ERdd*, *DIS3-ERdd* and derived double ERdd-tagged strains, were assessed for the stringency of containment they offer. This was done by assaying the frequency of escape colonies occurring on restrictive medium. To this end, eight independent cultures of the assayed strain were plated on YPD without estradiol (restrictive environment) and at a suitable dilution on YPD with estradiol (permissive environment) to determine the number of colony forming units.

Afforded containment varied drastically between the three genes when individually tagged with ERdd. *SPC110-ERdd* had the lowest escape frequency of  $7.0 \times 10^{-8}$ , followed by *DIS3-ERdd* with  $6.1 \times 10^{-7}$ . *RRP46-ERdd* kept growing very slowly on restrictive plates, leading to the continued emergence of escaper colonies with prolonged incubation, making the quantification of an escape frequency infeasible. Combining *SPC110-ERdd* with an ERdd tag on either *RRP46* or *DIS3* resulted in stringently contained strains with escape frequencies below the detection limit of this assay, not yielding a single escapee colony. Subsequently, assays for low escape frequencies were carried out for these strains, plating about  $5 \times 10^9$  colony forming units on restrictive plates, which were replica plated for single colony detection. Again, no escapee colonies were observed. Accordingly, escape frequencies of *SPC110-ERdd/RRP46-ERdd* and *SPC110-ERdd/DIS3-ERdd* were below the assay's detection limit of  $2 \times 10^{-10}$ . In contrast, ERdd tagging both *RRP46* and *DIS3* yielded an escape frequency of  $4.3 \times 10^{-7}$ , not markedly improving containment over singly tagged *DIS3-ERdd* ( $6.1 \times 10^{-7}$ ). Interestingly, both *RRP46* and *DIS3* code for subunits of the exosome complex essential for RNA metabolism.

Eight escapee strains from each of the three singly ERdd-tagged were isolated, and the ERdd-tagged gene was Sanger sequenced. For the sequenced *SPC110-ERdd* escapees, seven unique escape mutations were found, mapping to the C-terminal part of the Spc110 protein or the linker to the ERdd tag (Figure 5). All of them lead to a premature stop, leading the absence of the ERdd tag. Seven of the eight mutants were missing a C-terminal portion of the protein. The C-terminal region of Spc110p is known to be involved in binding to calmodulin, but not

essential for viability [21]. Interestingly, no mutations within the ERdd tag itself were found, indicating its resistance against escape by truncation. Based on this finding, we generated an ERdd fusion omitting the non-essential C-terminal domain, *SPC110Δ845-ERdd*. This indeed increased containment stringency without compromising growth under permissive conditions. The strain's escape frequency was below the detection limit of the standard escape assay, not yielding escape colonies. In a low escape frequency assay an escape rate of  $4.3 \times 10^{-9}$  was determined. All of the sampled *SPC110Δ845-ERdd* escape mutations mapped to the linker or ERdd tag, demonstrating that escape routes through truncating mutations in *SPC110* itself have been closed off by removal of its C-terminal region.

The sampled *RRP46-ERdd*, *DIS3-ERdd*, and doubly tagged *RRP46-ERdd/DIS3-ERdd* escapees had no escape mutations in the respective fusion genes. To elucidate their escape mechanism, the whole genome of three clones of each were sequenced by Illumina sequencing (Supplementary Data S3). For each of the six escapees with an ERdd-tagged *DIS3* gene, a mutation likely to reduce proteasome activity could be found. Three unique mutations (two non-sense, one frameshift) of *RPN4*, a transcription factor stimulating expression of proteasome genes were sampled. Further, a non-sense mutation of a chaperone for proteasome maturation (*UMPI*), and non-synonymous mutations of two proteins involved in proteasome regulation, *RPN3* and *RPT5*, were found. Likewise, for one of the *RRP46-ERdd* escapees a non-synonymous mutation of a proteasome subunit was the likely cause for containment escape. For the other two *RRP46-ERdd* escapees no obvious causative escape mutations could be identified.

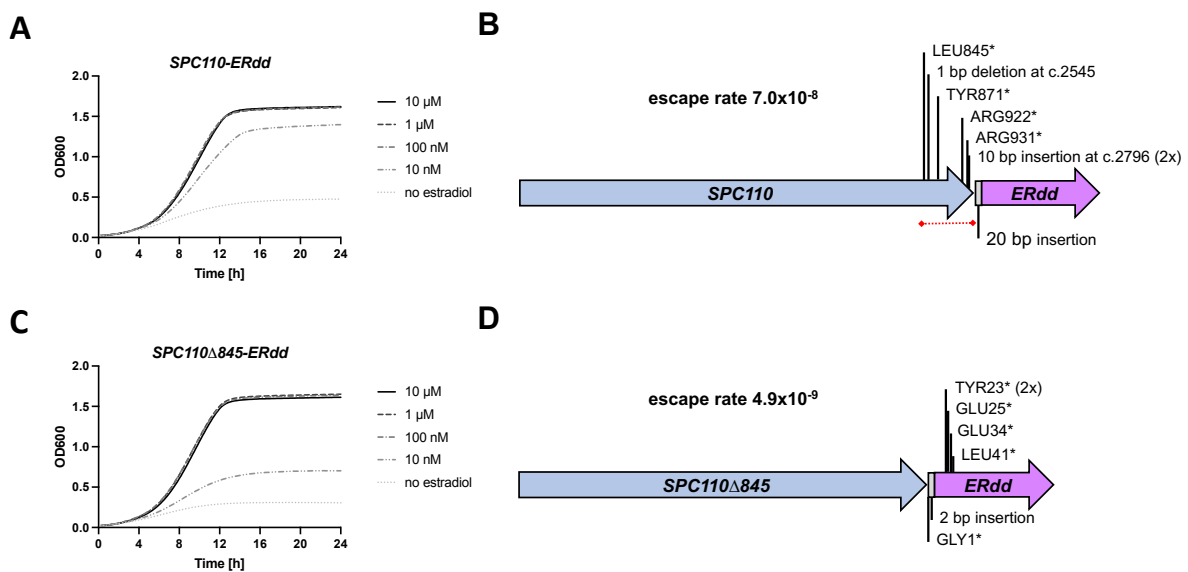

**Figure 5:** Escapee analysis of *SPC110-ERdd* and engineering for improved containment stringency. (A) Growth of *SPC110-ERdd* at different estradiol concentrations in YPD. (B) *SPC110-ERdd* containment escape mutations. Eight *SPC110-ERdd* escapees were sequenced, and seven unique escape mutations were found. All resulted in a premature translation stop by mutation to a stop codon or a frameshift, mapping to the C-terminal region of *SPC110* or the linker, and conversely removal of the ERdd tag. No mutations were found in *ERdd* itself. The dispensable C-terminal region of *SPC110* in which escape mutations clustered is marked with a red dashed line. (C) Growth of *SPC110Δ845-ERdd*, in which the C-terminal region has been removed, at different estradiol concentrations in YPD. As with *SPC110-ERdd*, growth is fully restored by 100 nM estradiol. (D) *SPC110Δ845-ERdd* containment stringency is markedly improved over *SPC110-ERdd*. Seven *SPC110Δ845-ERdd* escapees were sequenced. Each contained a unique escape mutation, two of which resulted in a stop codon at the same position (TYR23\* in ERdd). All of the sampled *SPC110Δ845-ERdd* escape mutations mapped to the linker or the ERdd tag.



## Competitive fitness of contained strains

The perfect containment system imparts no fitness defect under permissive conditions such that there is no evolutionary incentive to inactivate the containment system under prolonged culture. The strains contained by single or dual ERdd fusion to *SPC110*, *DIS3*, or *RRP46* and respective combinations showed growth that was indistinguishable from that of the parental BY4742 with 1  $\mu$ M estradiol in growth assays. However, a much more stringent measure for fitness is the competition against the parental strain under repeated, lab-typical batch cultures, cycling through different physiological states. Competition cultures were carried out over ten such cultures cycles for a total of 100 generations with 1  $\mu$ M estradiol (Figure 6). None of the above-mentioned single and dual ERdd strains were significantly or with a clear trend outcompeted by the parental strain. This apparent lack of evolutionary incentive for containment inactivation should result in a high stability of the containment system in prolonged culture under permissive conditions, which was directly assessed by cultivation of eight independent *SPC110-ERdd* cultures over 100 generations under permissive conditions followed by assaying the escape frequencies. The measured average escape frequency after 100 generations was  $2.2 \times 10^{-8}$ , not having increased following prolonged culture.

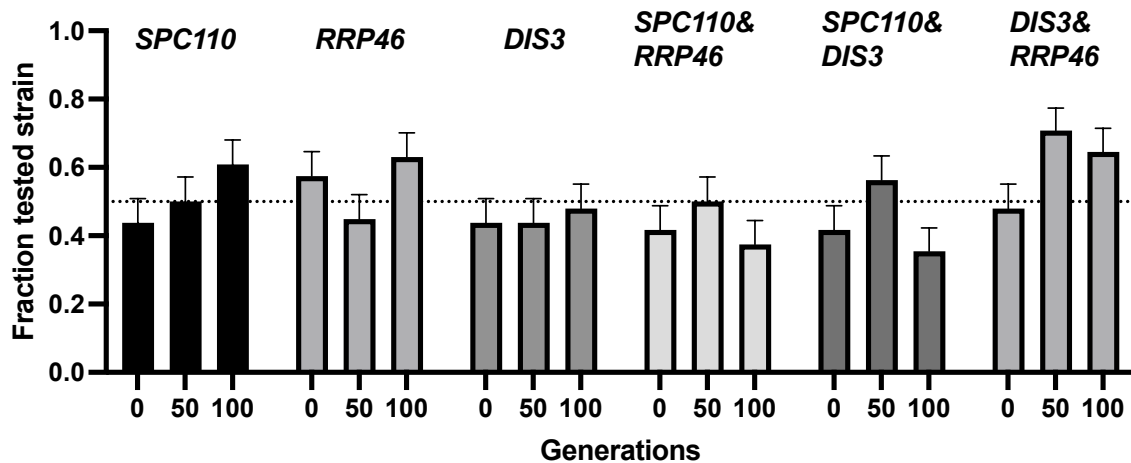

**Figure 6:** Competition of singly and doubly ERdd-contained strains against BY4742 under permissive condition, in YPD with 1  $\mu$ M estradiol. Respective contained strains were mixed 1:1 with BY4742 and grown for a total of 100 generations, with the relative frequencies of respective strains assessed after 0, 50 and 100 generations by colony PCR. None of the containment strains were significantly depleted in permissive medium in competition with the parental strain BY4742.

## Discussion

The availability of stringent, stable and use case-suited intrinsic biocontainment systems is vital for a next-generation bioeconomy, one that leverages the possibilities synthetic biology in open-environment applications. Due to their high replicative potential and involved large number of individual organisms, safely and effectively containing engineered microorganisms through genetic systems is particularly challenging. An NIH guideline for work with synthetic or recombinant nucleic acids in laboratory settings calls for systems with an escape rate of less than  $10^{-8}$ . Since a single millilitre of a densely grown culture can easily contain  $10^8$  cells, this threshold is clearly insufficient for applications on industrial scales. Reaching adequate containment stringency including a generous safety margin likely will be require the combination of multiple independent systems.

Here, based on conditional stability of essential proteins, we have developed a new class of genetic biocontainment systems. Using a destabilising domain (DD) conditional degron and applying a systematic, large-scale search for suitable essential genes from 775 genes, we have

identified *SPC110*, *DIS3* and *RRP46* as suitable target genes for this system. Fused to *ERdd*, these genes rendered cells dependent on estradiol with wild-type-like fitness under permissive conditions. *SPC110-ERdd* was particularly suited, with a stringency nearly satisfying the mentioned NIH guideline. Escapee analysis revealed that premature translation stops in the C-terminal region of Spc110p were the most frequent escape mechanism. Fusion of an accordingly truncated *SPC110* to the ERdd tag resulted in escape frequencies of less than  $10^{-8}$ . Also, combining *SPC110-ERdd* with an ERdd tag on either of the other two genes resulted in containment greatly exceeding these guideline requirements.

*SPC110-ERdd*, *SPC110 $\Delta$ 845-ERdd* and *SPC110-ERdd/RRP46-ERdd* required as little as 100 nM estradiol to achieve fitness indistinguishable from the wild type. This equates to cost of less than \$1 to treat 1000 L of culture, making it a highly cost-effective approach. The systems can be combined with estradiol-dependent transcription of essential genes, which allows controlling two independently working genetic containment systems with a single, near-gratuitous ligand at nanomolar concentrations. We have previously leveraged a chimeric, estradiol-inducible transcriptional activator of *GAL* promoters (GAL-EBD-VP16) [22] with select essential genes to create stringent biocontainment [11, 12]. Alternatively, a more recent, similar system (ZEV) [23] allowing estradiol-dependent transcription from synthetic promoters could be used. Recently, a comprehensive screen of over 1000 essential genes with the ZEV system was reported, identifying several hundred genes with estradiol-dependent growth when under its control [24]. These could be purposefully screened for suitability for biocontainment.

The work presented here shows conclusively that conditional stability of select essential proteins can be leveraged to create stringent and stable biocontainment with specific ligand dependence. However, alternative small molecules might be beneficial use cases in which the utilisation of estradiol for biocontainment is undesirable. For instance, large-scale use of estradiol with discharge into the environment can be environmentally problematic due to its endocrine activity [25]. Notably, there are more ‘destabilising domain’ (DD) systems based on different protein scaffolds available that respond to other ligands: DD systems responding to the synthetic ligand Shield-1 [19], trimethoprim [26], and bilirubin [27], respectively, have previously been developed. These alternative DD degrons should allow analogously creating biocontainment systems responding to their respective ligands.

## Materials and methods

### Strains, plasmids, synthetic gene fragments and oligonucleotides

The yeast GFP collection [28] and the *S. cerevisiae* strain BY4742 were used for the creation of the essential GFP-ERdd library (Supplementary Data S1) and generation of direct ERdd fusion strains (Table S1), respectively. DNA constructs made in this study as plasmids were cloned and amplified in *E. coli* DH5 $\alpha$ . For creation of gRNA plasmids, pairs of oligonucleotides containing the respective target sequence and bases to create required overhangs (Table S2) were annealed. Subsequently, they were cloned into the gRNA entry vector pWS082 in a Golden Gate reaction (30 cycles of 1 min at 37°C, 1 min at 16°C and heat inactivation for 5 min at 80°C) with 40 nM of annealed insert, 50 ng of pWS082, 5U Esp3I and 20U T4 DNA ligase in 10  $\mu$ l T4 DNA ligase buffer. The *ERdd GFP LEU2* donor plasmid SHe146 (Supplementary Data S4) was cloned by Golden Gate assembly from parts PCR amplified from pScDD2\_ERdd (Addgene plasmid #109047), pWS082 (Addgene plasmid #90516), genomic DNA from the yeast GFP collection, and pRS415 [29]. Donors for direct ERdd fusions were ordered as gene fragments from Twist Bioscience (Supplementary Data S5). For confirmation of edits and for strain identification by colony PCR, pairs of primers spanning the end of the respective coding sequence were used (Table S2).

## Creation of essential GFP-ERdd library

The yeast GFP collection (in a *S. cerevisiae* BY4741 background) was spotted in 384 well format on Synthetic Complete (SC) -His agar. The available GFP strains were cross-referenced with a list of *S. cerevisiae* essential genes (essglist). The respective strains with GFP labelled essential genes were cherrypicked onto SC -His agar in 96 well format using a Singer Instruments PIXL colony picking robot. The GFP cassette with the *HIS3MX6* marker gene was used as a landing pad for CRISPR/Cas9-based insertion of the ERdd as a C-terminal fusion to the GFP, while swapping *HIS3MX6* for a *LEU2* marker gene. For transformation, strains were inoculated into YPD medium in a deepwell plate and grown over night at 30°C at 850 rpm. The next day, new cultures were set up in a deepwell plate by inoculating 1 ml YPD with 20 µl of the respective overnight culture each and grown for 4h at 30°C at 850 rpm. The cultures then were pelleted and washed with 1 ml, followed by another wash step with 0.5 ml 100 mM LiOAc. Supernatant was removed and a transformation mixture was added to achieve final concentrations of 33.3% PEG 3350, 100 mM LiOAc, 0.3 mg/ml boiled herring sperm DNA (Promega) with about 200 ng pWS174 digested with Esp3I (Cas9 plasmid), 400 ng of the *HIS3MX6* guide plasmid digested with EcoRV and 1300 ng SHe146 digested with NotI (*GFP-ERdd LEU2* donor). Digested plasmids were purified by isopropanol precipitation and ethanol wash prior to transformation. The deepwell transformation plate was thoroughly vortexed and incubated 1h at 37°C at 850 followed by 20 min at 42°C. Cell suspensions were pelleted, the supernatant removed, and the cells resuspended in 950 µl SC -Leu with 1 µM estradiol. These cultures selective for genomic insertion of the donor were incubated at 30°C at 850 rpm. After 18h, nourseothricin was added to a final concentration of 100 µg/ml to select for presence of the reconstituted Cas9 plasmid. After 48h the transformation cultures were pinned onto SC -Leu agar with 1 µM estradiol using a Singer Instruments ROTOR replicating robot in a 7 by 7 pattern for each culture, creating a dilution series for each transformation outgrowth to obtain separated colonies. Up to four individual colonies were picked from each pinned transformation first onto SC -His, then onto SC -Leu and finally onto SC -Leu with 1 µM estradiol agar with the PIXL robot.

## Screening of GFP-ERdd library

The primary screening of the essential GFP-ERdd library for estradiol regulation was done on agar. From the SC -Leu +1 µM estradiol agar plates from the transformation, one (out of up to four) colony from each transformation was spotted with the PIXL robot, first onto YPD and then onto YPD +1 µM estradiol agar in a 96 well layout. Only His auxotroph colonies were picked, and colonies with apparent regulation by estradiol were preferentially selected. The plates were incubated for 2 days at 30°C and then imaged with a Singer Instruments Phenobooth, and colony sizes were assessed. The log ratio of the colony size with estradiol to the size without estradiol was the metric used to select the 46 highest scoring strains for the secondary screening.

The secondary screening was done in liquid culture in a plate reader. The strains selected from the primary screen were grown over night in YPD with 1 µM estradiol at 30°C and 850 rpm in a deepwell plate. The next day, the cultures were washed once with YPD without estradiol. In a 96 well F-bottom microtiter plate with lid, for each strain one sample of 200 µl YPD without and one sample of YPD with 1 µM estradiol was set up and inoculated 1:100 with the respective washed cell suspension. The assay was run for 24h at 30°C in a BioTek Synergy H1M plate reader, recording the optical density at 600 nm every 10 min and shaking between the measurement cycles. The growth curve without estradiol was subtracted from the growth curve with estradiol and the area under the difference curve was calculated. Strains were ranked by the area under curve averaged from three assay runs.

To investigate degradation of the essential GFP-ERdd fusion protein, growth assays in a plate reader were carried out like the secondary screening, but in SC -Leu and measuring the GFP fluorescence (excitation 479 nm, emission 520 nm, gain 100, with background subtraction) in addition to optical density.

### **Markerless ERdd insertion**

The six highest ranked candidate genes from the secondary screening were created as direct markerless ERdd fusions in a BY4742 background using a CRISPR/Cas9 approach. A standard LiOAc yeast transformation protocol was used: exponentially growing yeast cells were harvested, washed first with water and then with 100 mM LiOAc. The final transformation mix contained cells from 5 ml culture in 400  $\mu$ l with final concentrations of 33.3% PEG 3350, 100 mM LiOAc, 0.3 mg/ml boiled herring sperm DNA (Promega) and about 500 ng pWS174 digested with Esp3I (Cas9 plasmid), 600 ng of the respective guide construct digested with EcoRV and 1000 ng of the respective donor DNA (Twist Bioscience). After thorough mixing, transformation cultures were incubated at 30°C at 200 rpm and then 20 min at 42°C. Cultures were spun down and resuspended in 500  $\mu$ l YPD with 1  $\mu$ M estradiol. After a transformation outgrowth period of 1-2 h at 30°C under shaking, 100  $\mu$ l were plated on YPD agar with 100  $\mu$ g/ml nourseothricin and 1  $\mu$ M estradiol and incubated for 3d at 30°C. Colonies were picked with a PIXL robot onto YPD with 1  $\mu$ M estradiol. Insertion was confirmed by colony PCR. A correct clone was restreaked both on YPD with 1  $\mu$ M estradiol, and loss of the Cas9 plasmid was confirmed by spotting colonies onto YPD with 1  $\mu$ M estradiol and YPD with 1  $\mu$ M estradiol and 100  $\mu$ g/ml nourseothricin. Strains with two ERdd fusions were created the same way, starting with strains that already had one of the two genes ERdd tagged.

### **Assaying estradiol response**

The growth response of individual strains to estradiol was assessed both in liquid culture using a plate reader and in spot assays on solid media. Strains were cultured overnight in YPD with 1  $\mu$ M estradiol, washed once in YPD, and adjusted to an OD 0.1 in YPD. With these cell suspensions, assays in the plate reader were carried out like the secondary screening, but at 10  $\mu$ M, 1  $\mu$ M, 100 nM, 10 nM and no estradiol, with duplicates for each estradiol concentration. For spot assays, log<sub>10</sub> dilution series of the OD 0.1 cell suspensions to OD 10<sup>-7</sup> were prepared and 5  $\mu$ l of each dilution were spotted on YPD agar at the different estradiol concentrations used (10  $\mu$ M, 1  $\mu$ M, 100 nM, 10 nM and no estradiol), incubated at 30°C and imaged with a Phenobooth after two and three days.

### **Escape rate analysis**

For assessment of escape rates of ERdd strains, 8 individual colonies were picked into YPD with 1  $\mu$ M estradiol and incubated overnight at 30°C and 850 rpm. The next day the cultures were washed twice with YPD with no estradiol and a log<sub>10</sub> dilution series to 10<sup>-5</sup> was prepared. From each replicate 100  $\mu$ l of the washed undiluted culture were plated on YPD agar without estradiol, and 100  $\mu$ l of the 10<sup>-5</sup> dilution were plated on YPD agar with 1  $\mu$ M estradiol. Plates were incubated for 2 days at 30°C and colonies counted on each. The number of escapees on restrictive medium (no estradiol) was divided by total colony forming units extrapolated from the colony number on the permissive medium (with estradiol). For each strain the average escape rate was determined from the 8 replicates.

For assessment of low escape frequencies, 50 ml of overnight cultures (in YPD with 1  $\mu$ M estradiol) were washed twice with water and resuspended in 5 ml YPD. This suspension was plated onto ten Petri dishes with YPD agar without estradiol. After 2 days at 30°C, the dishes

were replica plated onto fresh YPD agar without estradiol and incubated for another 2 days at 30°C. To estimate the total plated number of colony-forming units, 100 µl of a 10<sup>-6</sup> dilution of the washed and concentrated cell suspension were plated on permissive medium.

### Whole genome sequencing

Containment strains to be sequenced and the parental strain BY4742 were grown overnight in permissive medium (YPD with 1 µM estradiol). DNA was isolated from 1.5 ml of culture with a MasterPure Yeast DNA Purification Kit and taken up in 50 µl TE buffer. To remove RNA contamination of the DNA preparation, 1 µl of 4 mg/ml RNase A (Promega) was added and the sample incubated for 30 min at 37°C. The DNA was then column purified and eluted with 50 µl water. Sequencing library preparation, Illumina sequencing, mapping of reads and variant calling was performed by Eurofins Genomics. Reads were pre-processed with fastp v0.20.0 [30] and mapped with BWA v0.7.17 [31]. Subsequent variant calling was done using Sentieon's HaplotypeCaller. Variants in coding sequences that passed quality control filters, were not found in the parental strain and were present in at least half of respective reads were annotated using VariantAnnotation v1.40 [32].

### Competition and stability assay

For assessing long-term competitive fitness compared with the parental strain, BY4742 and the ERdd strain to be assayed were each picked into YPD with 1 µM estradiol and incubated overnight at 30°C. The overnight cultures were mixed 1:1 and the mixture diluted 1:1000 in YPD with 1 µM estradiol and incubated for 24h at 30°C under shaking. Thereafter, the culture was rediluted 1:1000 for another 24h of growth. This was repeated for a total of 10 days of growth of the mixed culture, representing about 100 generations. Aliquots of the initial mixture and the mixed culture after days 5 and 10 were plated on YPD agar with 1 µM estradiol to assess the genotype frequencies by colony PCR. To investigate long-term stability of the containment, ERdd strains were similarly cultured over 10 days for about 100 generations in 8 independent cultures, from which an escape rate analysis was performed.

### Acknowledgements

This work is supported by grants from the EPSRC (EP/V05967X/1), the BBSRC (BB/W014483/1) and the Volkswagen Foundation "Life? Initiative" (Ref. 94 771). The authors thank Shuangying Jiang and Junbiao Dai for providing, and Ellie Payne and Reem Swidah for archiving the yeast GFP collection. The authors also thank Raymond Wan for variant annotation of whole genome sequencing data. The Cas9 expression plasmid pWS174 (Addgene plasmid #90961) and the gRNA entry vector pWS082 (Addgene plasmid #90516) were gifts from Tom Ellis. The plasmid pScDD2\_ERdd (Addgene plasmid #109047) was a gift from Thomas Wandless.

### References

1. Wells, C.L., et al., *Inability of debilitated Escherichia coli chi 1776 to colonise germ-free rodents*. Nature, 1978. **274**(5669): p. 397-8.
2. Steidler, L., et al., *Biological containment of genetically modified Lactococcus lactis for intestinal delivery of human interleukin 10*. Nat Biotechnol, 2003. **21**(7): p. 785-9.
3. S. Molin, P.K., L. K. Poulsen, H. Biehl, K. Gerdes & P. Andersson *Conditional Suicide System for Containment of Bacteria and Plasmids*. Bio/Technology, 1987. **5**: p. 1315-1318.

4. Knudsen, S.M. and O.H. Karlstrom, *Development of efficient suicide mechanisms for biological containment of bacteria*. Appl Environ Microbiol, 1991. **57**(1): p. 85-92.
5. Contreras, A., S. Molin, and J.L. Ramos, *Conditional-suicide containment system for bacteria which mineralize aromatics*. Appl Environ Microbiol, 1991. **57**(5): p. 1504-8.
6. Stirling, F., et al., *Rational Design of Evolutionarily Stable Microbial Kill Switches*. Mol Cell, 2017. **68**(4): p. 686-697 e3.
7. Broto, A., et al., *A genetic toolkit and gene switches to limit Mycoplasma growth for biosafety applications*. Nat Commun, 2022. **13**(1): p. 1910.
8. Caliando, B.J. and C.A. Voigt, *Targeted DNA degradation using a CRISPR device stably carried in the host genome*. Nat Commun, 2015. **6**: p. 6989.
9. Szafranski, P., et al., *A new approach for containment of microorganisms: dual control of streptavidin expression by antisense RNA and the T7 transcription system*. Proc Natl Acad Sci U S A, 1997. **94**(4): p. 1059-63.
10. Chan, C.T., et al., *'Deadman' and 'Passcode' microbial kill switches for bacterial containment*. Nat Chem Biol, 2016. **12**(2): p. 82-6.
11. Cai, Y., et al., *Intrinsic biocontainment: multiplex genome safeguards combine transcriptional and recombinational control of essential yeast genes*. Proc Natl Acad Sci U S A, 2015. **112**(6): p. 1803-8.
12. Agmon, N., et al., *Low escape-rate genome safeguards with minimal molecular perturbation of Saccharomyces cerevisiae*. Proc Natl Acad Sci U S A, 2017. **114**(8): p. E1470-E1479.
13. Gallagher, R.R., et al., *Multilayered genetic safeguards limit growth of microorganisms to defined environments*. Nucleic Acids Res, 2015. **43**(3): p. 1945-54.
14. Renicke, C., et al., *A LOV2 domain-based optogenetic tool to control protein degradation and cellular function*. Chem Biol, 2013. **20**(4): p. 619-26.
15. Dohmen, R.J., P. Wu, and A. Varshavsky, *Heat-inducible degron: a method for constructing temperature-sensitive mutants*. Science, 1994. **263**(5151): p. 1273-6.
16. Nishimura, K., et al., *An auxin-based degron system for the rapid depletion of proteins in nonplant cells*. Nat Methods, 2009. **6**(12): p. 917-22.
17. Yesbolatova, A., et al., *The auxin-inducible degron 2 technology provides sharp degradation control in yeast, mammalian cells, and mice*. Nat Commun, 2020. **11**(1): p. 5701.
18. Chung, H.K., et al., *Tunable and reversible drug control of protein production via a self-excising degron*. Nat Chem Biol, 2015. **11**(9): p. 713-20.
19. Banaszynski, L.A., et al., *A rapid, reversible, and tunable method to regulate protein function in living cells using synthetic small molecules*. Cell, 2006. **126**(5): p. 995-1004.
20. Miyazaki, Y., et al., *Destabilizing domains derived from the human estrogen receptor*. J Am Chem Soc, 2012. **134**(9): p. 3942-5.
21. Geiser, J.R., et al., *The essential mitotic target of calmodulin is the 110-kilodalton component of the spindle pole body in Saccharomyces cerevisiae*. Mol Cell Biol, 1993. **13**(12): p. 7913-24.
22. McIsaac, R.S., et al., *Fast-acting and nearly gratuitous induction of gene expression and protein depletion in Saccharomyces cerevisiae*. Mol Biol Cell, 2011. **22**(22): p. 4447-59.
23. McIsaac, R.S., et al., *Synthetic gene expression perturbation systems with rapid, tunable, single-gene specificity in yeast*. Nucleic Acids Res, 2013. **41**(4): p. e57.
24. Arita, Y., et al., *A genome-scale yeast library with inducible expression of individual genes*. Mol Syst Biol, 2021. **17**(6): p. e10207.

25. Adeel, M., et al., *Environmental impact of estrogens on human, animal and plant life: A critical review*. Environ Int, 2017. **99**: p. 107-119.
26. Iwamoto, M., et al., *A general chemical method to regulate protein stability in the mammalian central nervous system*. Chem Biol, 2010. **17**(9): p. 981-8.
27. Navarro, R., et al., *A Novel Destabilizing Domain Based on a Small-Molecule Dependent Fluorophore*. ACS Chem Biol, 2016. **11**(8): p. 2101-4.
28. Huh, W.K., et al., *Global analysis of protein localization in budding yeast*. Nature, 2003. **425**(6959): p. 686-91.
29. Sikorski, R.S. and P. Hieter, *A system of shuttle vectors and yeast host strains designed for efficient manipulation of DNA in Saccharomyces cerevisiae*. Genetics, 1989. **122**(1): p. 19-27.
30. Chen, S., et al., *fastp: an ultra-fast all-in-one FASTQ preprocessor*. Bioinformatics, 2018. **34**(17): p. i884-i890.
31. Li, H. and R. Durbin, *Fast and accurate short read alignment with Burrows-Wheeler transform*. Bioinformatics, 2009. **25**(14): p. 1754-60.
32. Obenchain, V., et al., *VariantAnnotation: a Bioconductor package for exploration and annotation of genetic variants*. Bioinformatics, 2014. **30**(14): p. 2076-8.

## Supporting Information

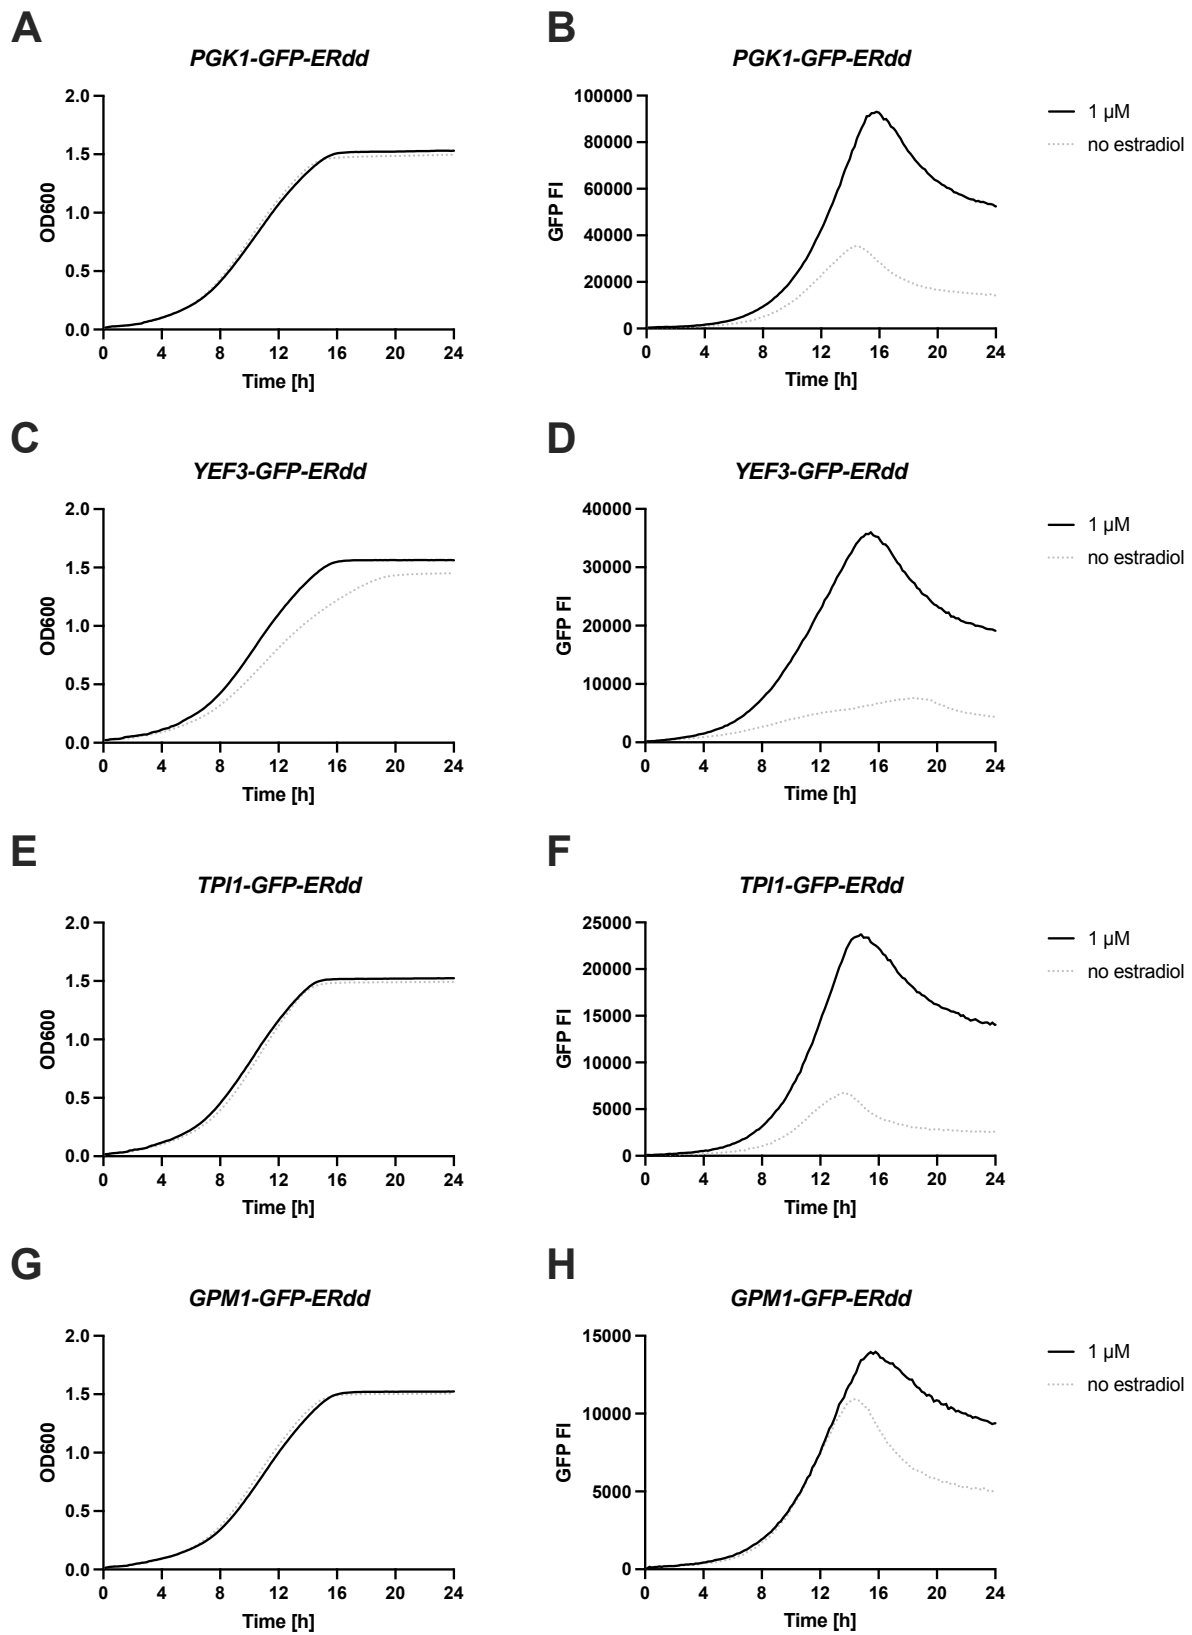

**Figure S1:** Liquid growth assays with recording of GFP fluorescence intensity of GFP-ERdd strains without and with 1  $\mu$ M estradiol. Growth was monitored by measuring optical density at 600 nm (left column) and fluorescence intensity (right column) as measure for relative abundance of the essential GFP-ERdd fusion protein.



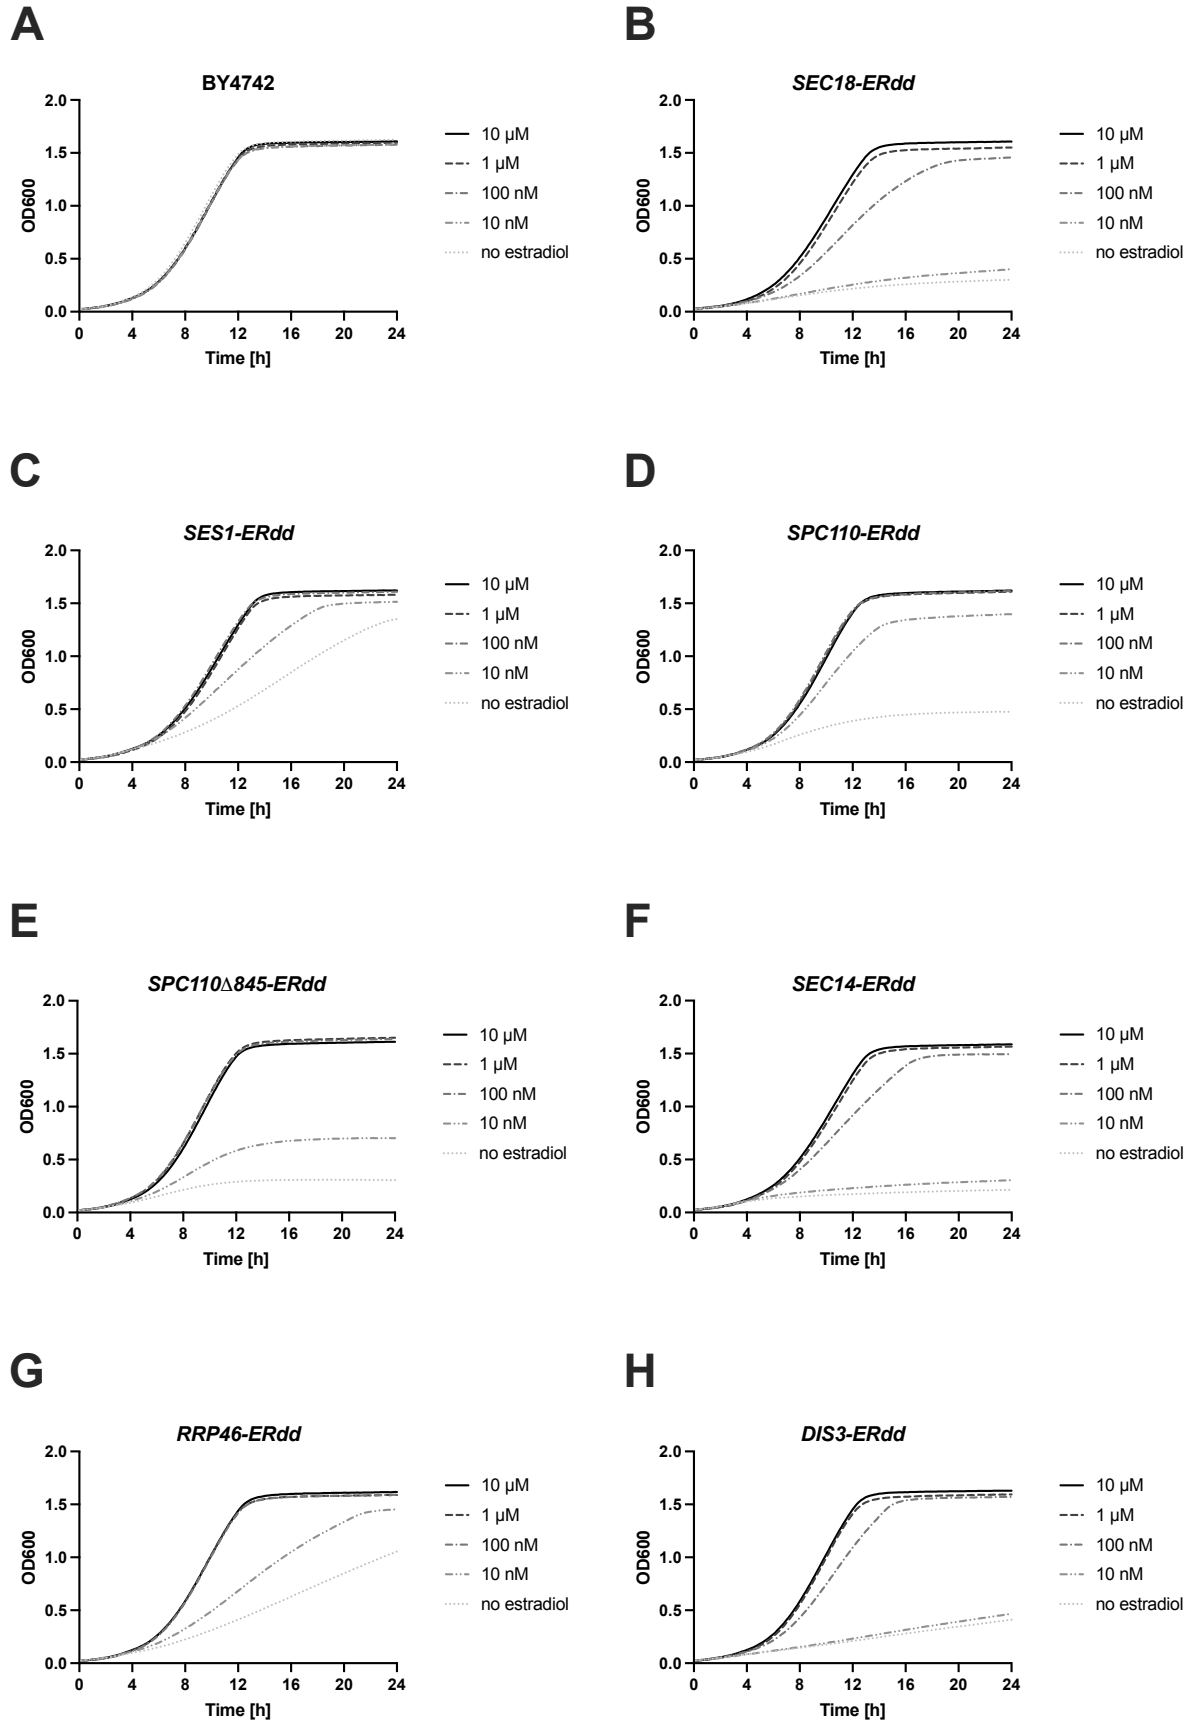

**Figure S2:** Liquid growth assays to assay estradiol dependence in wildtype BY4742 and singly ERdd-tagged strains.

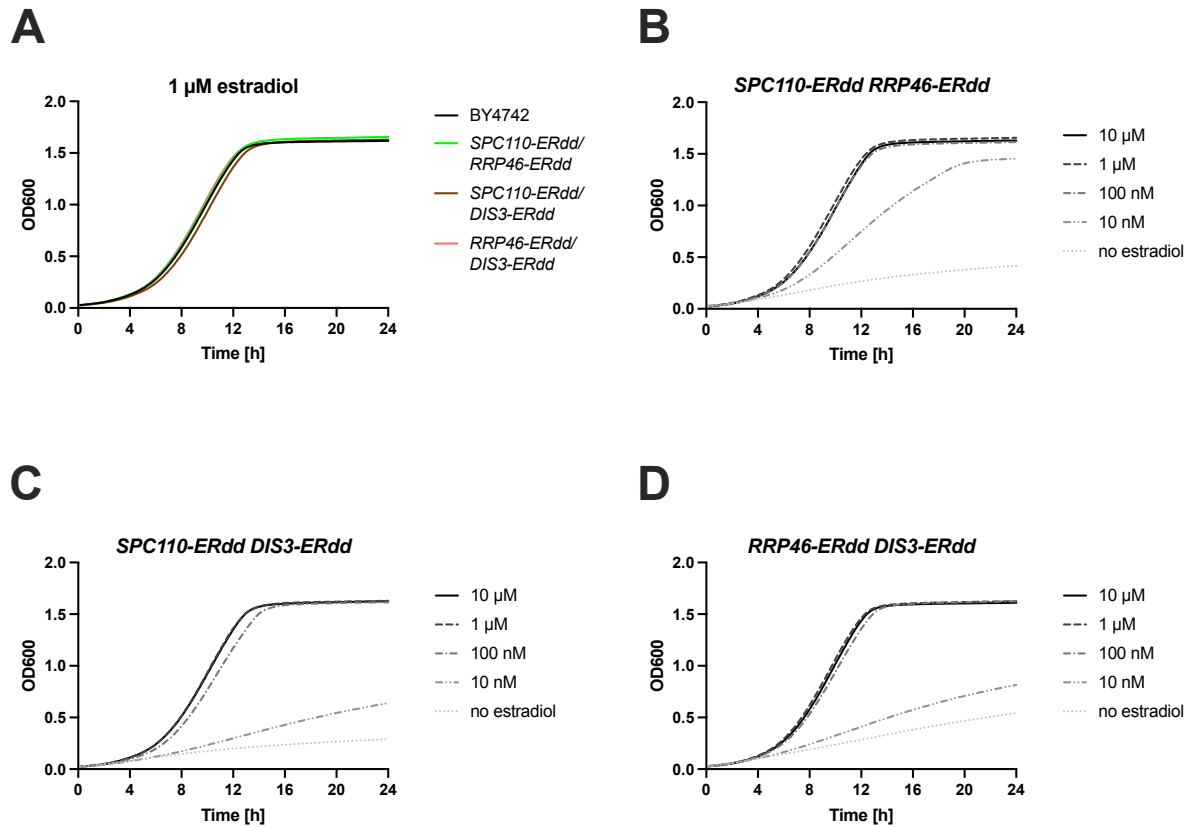

**Figure S3:** Liquid growth assays to assay estradiol dependence in strains with two select essential genes ERdd-tagged.

**Table S1:** Generated direct ERdd fusion strains.

| Strain ID | ERdd-tagged gene(s)  | Parent | Genotype                                                    |
|-----------|----------------------|--------|-------------------------------------------------------------|
| SHy110    | <i>SEC18</i>         | BY4742 | <i>MATα his3Δ1 leu2Δ lys2Δ ura3Δ SEC18-ERdd</i>             |
| SHy111    | <i>SES1</i>          | BY4742 | <i>MATα his3Δ1 leu2Δ lys2Δ ura3Δ SES1-ERdd</i>              |
| SHy112    | <i>SPC110</i>        | BY4742 | <i>MATα his3Δ1 leu2Δ lys2Δ ura3Δ SPC110-ERdd</i>            |
| SHy113    | <i>SEC14</i>         | BY4742 | <i>MATα his3Δ1 leu2Δ lys2Δ ura3Δ SEC14-ERdd</i>             |
| SHy114    | <i>RRP46</i>         | BY4742 | <i>MATα his3Δ1 leu2Δ lys2Δ ura3Δ RRP46-ERdd</i>             |
| SHy115    | <i>DIS3</i>          | BY4742 | <i>MATα his3Δ1 leu2Δ lys2Δ ura3Δ DIS3-ERdd</i>              |
| SHy117    | <i>SPC110, RRP46</i> | SHy114 | <i>MATα his3Δ1 leu2Δ lys2Δ ura3Δ SPC110-ERdd RRP46-ERdd</i> |
| SHy118    | <i>SPC110, DIS3</i>  | SHy112 | <i>MATα his3Δ1 leu2Δ lys2Δ ura3Δ SPC110-ERdd DIS3-ERdd</i>  |
| SHy119    | <i>RRP46, DIS3</i>   | SHy115 | <i>MATα his3Δ1 leu2Δ lys2Δ ura3Δ RRP46-ERdd DIS3-ERdd</i>   |
| SHy121    | <i>SPC110Δ845</i>    | BY4742 | <i>MATα his3Δ1 leu2Δ lys2Δ ura3Δ YDR356WΔ845-ERdd</i>       |

**Table S2:** Oligonucleotides used in this study.

| <b>Oligonucleotide description</b> | <b>Sequence</b>             |
|------------------------------------|-----------------------------|
| HIS3MX6 guide sense                | gactttTTCCCAAGCTACTCAGTCAC  |
| HIS3MX6 guide anti-sense           | aaacGTGACTGAGTAGCTTGGGAAaa  |
| YBR080C guide sense                | gactttTTGAAATAATTATGCGGATT  |
| YBR080C guide anti-sense           | aaacAATCCGCATAATTATTTCAAaa  |
| YDR023W guide sense                | gactttCTTTTTCTTGTCTTACTAG   |
| YDR023W guide anti-sense           | aaacCTAGTAAAGACAAGAAAAAGaa  |
| YDR356W guide sense                | gactttGTAGCAGCGGGCGTATATCT  |
| YDR356W guide anti-sense           | aaacAGATATACGCCCCGCTGCTACaa |
| YGR095C guide sense                | gactttAATGGCTATACTACTAGACG  |
| YGR095C guide anti-sense           | aaacCGTCTAGTTGTATAGCCATTaa  |
| YMR079W guide sense                | gactttATAATATCATTTTCATCGAAA |
| YMR079W guide anti-sense           | aaacTTTCGATGAAATGATATTATaa  |
| YOL021C guide sense                | gactttAGAATTATTGTTAAAATAGA  |
| YOL021C guide anti-sense           | aaacTCTATTTTAACAATAATTCTaa  |
| YBR080C fw 2178                    | CAATGTTCGGTATTA AAAAGACC    |
| YBR080C rv 200ds                   | ATCATCTTTACCCGGTGG          |
| YDR023W fw 1290                    | TTTGAGGAAATACATTCCAGGTG     |
| YDR023W rv 220ds                   | GGGTTATGAGGGA ACTATTTG      |
| YDR356W fw 2736                    | GAGGATGAAAAGGATTGCTTTTTAC   |
| YDR356W rv 230ds                   | AGATATACCCTACGTATGTTTTATGC  |
| YGR095C fw 672                     | GTTTCAGTTTACTGGAGCTG        |
| YGR095C rv 250ds                   | AAAGCAAGCTGGATAACAC         |
| YMR079W fw 594                     | ATCCAAGGGTGGGTTATAC         |
| YMR079W rv 200ds                   | ATAATCTAATAGCTGAGTGGAAG     |
| YOL021C fw 2907                    | ACCGAGGGATGTTTACG           |
| YOL021C rv 230ds                   | ACGTTGCCATCGTTG             |
